# Supplementary material for: Understanding crop genetic diversity under modern plant breeding
Source: PubMed Central journal article supplement (PMC4624815; doi:10.1007/s00122-015-2585-y), 2015-08-06
Supplement: 122_2015_2585_MOESM1_ESM.pdf [file 122_2015_2585_MOESM1_ESM.pdf]

Yong-Bi Fu (2015) Understanding crop genetic diversity under modern plant breeding. Theoretical and Applied Genetics. **Supplemental online materials**

**Table S1** Averaged parental genetic values achieved for the quantitative trait over 20 generations in simulated breeding programs with five breeding schemes under seven genetic models

| Gen | 0       | 1          | 2           | 3        | 4         | 5       | 6        | 7    | 8    | 9     | 10   | 11   | 12   | 13   | 14   | 15   | 16   | 17   | 18   | 19   | 20   |
|-----|---------|------------|-------------|----------|-----------|---------|----------|------|------|-------|------|------|------|------|------|------|------|------|------|------|------|
| Sn: | 1 NRep: | 100 Nloci: | 5000 Sloci: | 20 Ngen: | 20 Nprgy: | 50 Sel: | 0 Dom:   | 0    |      |       |      |      |      |      |      |      |      |      |      |      |      |
| S   | 1.0     | 1.0        | 1.0         | 1.0      | 1.0       | 1.0     | 1.0      | 1.0  | 1.0  | 1.0   | 1.0  | 1.0  | 1.0  | 1.0  | 1.0  | 1.0  | 1.0  | 1.0  | 1.0  | 1.0  | 1.0  |
| H   | 1.0     | 1.0        | 1.0         | 1.0      | 1.0       | 1.0     | 1.0      | 1.0  | 1.0  | 1.0   | 1.0  | 1.0  | 1.0  | 1.0  | 1.0  | 1.0  | 1.0  | 1.0  | 1.0  | 1.0  | 1.0  |
| SH  | 1.0     | 1.0        | 1.0         | 1.0      | 1.0       | 1.0     | 1.0      | 1.0  | 1.0  | 1.0   | 1.0  | 1.0  | 1.0  | 1.0  | 1.0  | 1.0  | 1.0  | 1.0  | 1.0  | 1.0  | 1.0  |
| HS  | 1.0     | 1.0        | 1.0         | 1.0      | 1.0       | 1.0     | 1.0      | 1.0  | 1.0  | 1.0   | 1.0  | 1.0  | 1.0  | 1.0  | 1.0  | 1.0  | 1.0  | 1.0  | 1.0  | 1.0  | 1.0  |
| HSH | 1.0     | 1.0        | 1.0         | 1.0      | 1.0       | 1.0     | 1.0      | 1.0  | 1.0  | 1.0   | 1.0  | 1.0  | 1.0  | 1.0  | 1.0  | 1.0  | 1.0  | 1.0  | 1.0  | 1.0  | 1.0  |
| Sn: | 2 NRep: | 100 Nloci: | 5000 Sloci: | 20 Ngen: | 20 Nprgy: | 50 Sel: | 0.1 Dom: | 0    |      |       |      |      |      |      |      |      |      |      |      |      |      |
| S   | 1.7     | 2.8        | 3.5         | 3.7      | 3.7       | 3.7     | 3.7      | 3.7  | 3.7  | 3.7   | 3.7  | 3.7  | 3.7  | 3.7  | 3.7  | 3.7  | 3.7  | 3.7  | 3.7  | 3.7  | 3.7  |
| H   | 1.6     | 2.0        | 2.4         | 3.4      | 4.4       | 5.2     | 5.9      | 6.2  | 6.3  | 6.4   | 6.4  | 6.4  | 6.4  | 6.4  | 6.4  | 6.4  | 6.4  | 6.4  | 6.4  | 6.4  | 6.4  |
| SH  | 1.6     | 2.8        | 3.5         | 3.7      | 3.7       | 3.7     | 3.7      | 3.7  | 3.7  | 3.7   | 2.3  | 3.8  | 4.4  | 5.0  | 5.6  | 5.7  | 5.8  | 5.8  | 5.8  | 5.8  | 5.8  |
| HS  | 1.7     | 2.0        | 2.4         | 3.5      | 4.4       | 5.3     | 5.9      | 6.2  | 6.4  | 6.4   | 6.5  | 6.5  | 6.5  | 6.5  | 6.5  | 6.5  | 6.5  | 6.5  | 6.5  | 6.5  | 6.5  |
| HSH | 1.6     | 2.0        | 2.4         | 4.0      | 4.0       | 5.4     | 5.4      | 6.2  | 6.2  | 6.5   | 6.5  | 6.5  | 6.5  | 6.5  | 6.5  | 6.5  | 6.5  | 6.5  | 6.5  | 6.5  | 6.5  |
| Sn: | 3 NRep: | 100 Nloci: | 5000 Sloci: | 20 Ngen: | 20 Nprgy: | 50 Sel: | 0.2 Dom: | 0    |      |       |      |      |      |      |      |      |      |      |      |      |      |
| S   | 2.6     | 6.9        | 11.1        | 12.1     | 12.1      | 12.1    | 12.1     | 12.1 | 12.1 | 12.1  | 12.1 | 12.1 | 12.1 | 12.1 | 12.1 | 12.1 | 12.1 | 12.1 | 12.1 | 12.1 | 12.1 |
| H   | 2.6     | 3.9        | 5.6         | 10.7     | 17.4      | 25.1    | 30.3     | 33.0 | 34.0 | 34.7  | 35.0 | 35.2 | 35.2 | 35.3 | 35.3 | 35.3 | 35.3 | 35.3 | 35.3 | 35.3 | 35.3 |
| SH  | 2.6     | 7.0        | 10.9        | 11.8     | 11.8      | 11.8    | 11.8     | 11.8 | 11.8 | 11.8  | 4.9  | 13.0 | 17.2 | 21.6 | 27.2 | 28.6 | 29.3 | 29.4 | 29.6 | 29.7 | 29.7 |
| HS  | 2.7     | 3.8        | 5.5         | 11.0     | 17.6      | 24.6    | 30.9     | 33.4 | 34.2 | 35.1  | 35.6 | 36.0 | 36.0 | 36.0 | 36.0 | 36.0 | 36.0 | 36.0 | 36.0 | 36.0 | 36.0 |
| HSH | 2.7     | 3.8        | 5.7         | 14.9     | 14.4      | 25.8    | 26.0     | 33.5 | 33.6 | 35.8  | 35.7 | 36.0 | 35.9 | 36.0 | 36.0 | 36.0 | 36.0 | 36.0 | 36.0 | 36.0 | 36.0 |
| Sn: | 4 NRep: | 100 Nloci: | 5000 Sloci: | 20 Ngen: | 20 Nprgy: | 50 Sel: | 0.1 Dom: | 0.5  |      |       |      |      |      |      |      |      |      |      |      |      |      |
| S   | 2.7     | 3.2        | 3.8         | 4.0      | 4.0       | 4.0     | 4.0      | 4.0  | 4.0  | 4.0   | 4.0  | 4.0  | 4.0  | 4.0  | 4.0  | 4.0  | 4.0  | 4.0  | 4.0  | 4.0  | 4.0  |
| H   | 2.6     | 3.3        | 4.2         | 5.1      | 6.0       | 6.6     | 6.7      | 6.7  | 6.7  | 6.7   | 6.7  | 6.7  | 6.7  | 6.7  | 6.7  | 6.7  | 6.7  | 6.7  | 6.7  | 6.7  | 6.7  |
| SH  | 2.7     | 3.3        | 3.8         | 4.1      | 4.1       | 4.1     | 4.1      | 4.1  | 4.1  | 4.1   | 4.1  | 4.1  | 5.0  | 5.7  | 6.2  | 6.2  | 6.2  | 6.2  | 6.2  | 6.2  | 6.2  |
| HS  | 2.7     | 3.3        | 4.2         | 5.1      | 5.9       | 6.6     | 6.7      | 6.7  | 6.7  | 6.7   | 6.7  | 6.7  | 6.7  | 6.7  | 6.7  | 6.7  | 6.7  | 6.7  | 6.7  | 6.7  | 6.7  |
| HSH | 2.6     | 3.2        | 4.2         | 5.2      | 5.9       | 6.6     | 6.7      | 6.7  | 6.7  | 6.7   | 6.7  | 6.7  | 6.7  | 6.7  | 6.7  | 6.7  | 6.7  | 6.7  | 6.7  | 6.7  | 6.7  |
| Sn: | 5 NRep: | 100 Nloci: | 5000 Sloci: | 20 Ngen: | 20 Nprgy: | 50 Sel: | 0.2 Dom: | 0.5  |      |       |      |      |      |      |      |      |      |      |      |      |      |
| S   | 6.8     | 10.2       | 13.4        | 15.0     | 15.1      | 15.1    | 15.1     | 15.1 | 15.1 | 15.1  | 15.1 | 15.1 | 15.1 | 15.1 | 15.1 | 15.1 | 15.1 | 15.1 | 15.1 | 15.1 | 15.1 |
| H   | 6.8     | 10.2       | 15.6        | 23.0     | 30.3      | 36.6    | 38.3     | 38.3 | 38.3 | 38.3  | 38.3 | 38.3 | 38.3 | 38.3 | 38.3 | 38.3 | 38.3 | 38.3 | 38.3 | 38.3 | 38.3 |
| SH  | 6.6     | 9.7        | 12.8        | 14.3     | 14.5      | 14.5    | 14.5     | 14.5 | 14.5 | 14.5  | 15.1 | 22.0 | 28.7 | 32.5 | 33.6 | 33.6 | 33.6 | 33.6 | 33.6 | 33.6 | 33.6 |
| HS  | 6.6     | 10.1       | 15.9        | 23.1     | 30.9      | 36.9    | 38.3     | 38.3 | 38.3 | 38.3  | 38.3 | 38.3 | 38.3 | 38.3 | 38.3 | 38.3 | 38.3 | 38.3 | 38.3 | 38.3 | 38.3 |
| HSH | 6.6     | 9.8        | 15.8        | 23.7     | 29.7      | 36.4    | 37.9     | 38.2 | 38.2 | 38.2  | 38.2 | 38.2 | 38.2 | 38.2 | 38.2 | 38.2 | 38.2 | 38.2 | 38.2 | 38.2 | 38.2 |
| Sn: | 6 NRep: | 100 Nloci: | 5000 Sloci: | 20 Ngen: | 20 Nprgy: | 50 Sel: | 0.1 Dom: | 1    |      |       |      |      |      |      |      |      |      |      |      |      |      |
| S   | 4.2     | 4.1        | 4.1         | 4.1      | 4.1       | 4.1     | 4.1      | 4.1  | 4.1  | 4.1   | 4.1  | 4.1  | 4.1  | 4.1  | 4.1  | 4.1  | 4.1  | 4.1  | 4.1  | 4.1  | 4.1  |
| H   | 4.3     | 5.9        | 6.4         | 6.6      | 6.7       | 6.7     | 6.7      | 6.7  | 6.7  | 6.7   | 6.7  | 6.7  | 6.7  | 6.7  | 6.7  | 6.7  | 6.7  | 6.7  | 6.7  | 6.7  | 6.7  |
| SH  | 4.3     | 4.3        | 4.3         | 4.4      | 4.4       | 4.4     | 4.4      | 4.4  | 4.4  | 4.4   | 4.4  | 6.4  | 6.3  | 6.4  | 6.4  | 6.4  | 6.4  | 6.4  | 6.4  | 6.4  | 6.4  |
| HS  | 4.2     | 5.9        | 6.5         | 6.6      | 6.7       | 6.7     | 6.7      | 6.7  | 6.7  | 6.7   | 6.7  | 6.7  | 6.7  | 6.7  | 6.7  | 6.7  | 6.7  | 6.7  | 6.7  | 6.7  | 6.7  |
| HSH | 4.3     | 5.9        | 6.4         | 6.2      | 6.7       | 6.7     | 6.7      | 6.7  | 6.7  | 6.7   | 6.7  | 6.7  | 6.7  | 6.7  | 6.7  | 6.7  | 6.7  | 6.7  | 6.7  | 6.7  | 6.7  |
| Sn: | 7 NRep: | 100 Nloci: | 5000 Sloci: | 20 Ngen: | 20 Nprgy: | 50 Sel: | 0.2 Dom: | 1    |      |       |      |      |      |      |      |      |      |      |      |      |      |
| S   | 16.6    | 16.1       | 16.3        | 16.4     | 16.4      | 16.4    | 16.4     | 16.4 | 16.4 | 16.4  | 16.4 | 16.4 | 16.4 | 16.4 | 16.4 | 16.4 | 16.4 | 16.4 | 16.4 | 16.4 | 16.4 |
| H   | 16.0    | 30.0       | 35.3        | 37.0     | 38.1      | 38.3    | 38.3     | 38.3 | 38.3 | 38.3  | 38.3 | 38.3 | 38.3 | 38.3 | 38.3 | 38.3 | 38.3 | 38.3 | 38.3 | 38.3 | 38.3 |
| SH  | 16.7    | 15.4       | 15.5        | 15.7     | 15.7      | 15.7    | 15.7     | 15.7 | 15.7 | 15.7  | 15.7 | 35.0 | 33.4 | 34.9 | 35.0 | 35.0 | 35.0 | 35.0 | 35.0 | 35.0 | 35.0 |
| HS  | 16.1    | 29.9       | 35.4        | 37.0     | 38.1      | 38.3    | 38.3     | 38.3 | 38.3 | 38.3  | 38.3 | 38.3 | 38.3 | 38.3 | 38.3 | 38.3 | 38.3 | 38.3 | 38.3 | 38.3 | 38.3 |
| HSH | 16.1    | 29.0       | 35.3        | 33.2     | 38.1      | 38.0    | 38.3     | 38.2 | 38.3 | 38.27 | 38.3 | 38.3 | 38.3 | 38.3 | 38.3 | 38.3 | 38.3 | 38.3 | 38.3 | 38.3 | 38.3 |

\* Gen=generation; Sn=genetic scenario number; NRep=number of replication; Nloci=number of loci; Sloci=number of selective loci; Ngen=number of generation; Nprgy=number of progeny; Sel=selection coefficient (*s*); Dom=dominance level (*h*); S=selving; H=half-sib; SH=selving+half-sib; HS=half-sib+selving; HSH=half-sib+selving+half-sib

**Table S2** Parental heterozygosity over 20 generations in simulated breeding programs with five breeding schemes under seven genetic models

| Gen | 0 | 1     | 2    | 3      | 4    | 5      | 6    | 7     | 8    | 9      | 10   | 11   | 12   | 13   | 14   | 15   | 16   | 17   | 18   | 19   | 20   |      |
|-----|---|-------|------|--------|------|--------|------|-------|------|--------|------|------|------|------|------|------|------|------|------|------|------|------|
| Sn: | 1 | NRep: | 100  | Nloci: | 5000 | Sloci: | 20   | Ngen: | 20   | Nprgy: | 50   | Sel: | 0    | Dom: | 0    |      |      |      |      |      |      |      |
| S   | 1 | 0.49  | 0.25 | 0.12   | 0.06 | 0.03   | 0.02 | 0.01  | 0.00 | 0.00   | 0.00 | 0.00 | 0.00 | 0.00 | 0.00 | 0.00 | 0.00 | 0.00 | 0.00 | 0.00 | 0.00 | 0.00 |
| H   | 1 | 0.91  | 0.85 | 0.89   | 0.84 | 0.79   | 0.74 | 0.69  | 0.63 | 0.58   | 0.54 | 0.50 | 0.46 | 0.42 | 0.39 | 0.36 | 0.33 | 0.30 | 0.28 | 0.26 | 0.23 |      |
| SH  | 1 | 0.91  | 0.77 | 0.68   | 0.64 | 0.61   | 0.60 | 0.59  | 0.59 | 0.58   | 0.58 | 0.58 | 0.57 | 0.54 | 0.53 | 0.49 | 0.46 | 0.43 | 0.39 | 0.36 | 0.34 |      |
| HS  | 1 | 0.91  | 0.97 | 0.93   | 0.88 | 0.83   | 0.77 | 0.71  | 0.66 | 0.61   | 0.56 | 0.46 | 0.37 | 0.32 | 0.29 | 0.28 | 0.27 | 0.26 | 0.26 | 0.26 | 0.26 |      |
| HSH | 1 | 0.91  | 0.85 | 0.87   | 0.66 | 0.72   | 0.56 | 0.58  | 0.46 | 0.47   | 0.37 | 0.38 | 0.30 | 0.31 | 0.24 | 0.25 | 0.20 | 0.20 | 0.16 | 0.16 | 0.13 |      |
| Sn: | 2 | NRep: | 100  | Nloci: | 5000 | Sloci: | 20   | Ngen: | 20   | Nprgy: | 50   | Sel: | 0.1  | Dom: | 0    |      |      |      |      |      |      |      |
| S   | 1 | 0.49  | 0.24 | 0.12   | 0.06 | 0.03   | 0.02 | 0.01  | 0.00 | 0.00   | 0.00 | 0.00 | 0.00 | 0.00 | 0.00 | 0.00 | 0.00 | 0.00 | 0.00 | 0.00 | 0.00 | 0.00 |
| H   | 1 | 0.91  | 0.85 | 0.89   | 0.84 | 0.79   | 0.74 | 0.68  | 0.63 | 0.58   | 0.54 | 0.49 | 0.45 | 0.42 | 0.38 | 0.35 | 0.32 | 0.30 | 0.28 | 0.25 | 0.23 |      |
| SH  | 1 | 0.91  | 0.77 | 0.68   | 0.64 | 0.61   | 0.60 | 0.59  | 0.59 | 0.58   | 0.58 | 0.58 | 0.57 | 0.54 | 0.52 | 0.49 | 0.46 | 0.42 | 0.39 | 0.36 | 0.33 |      |
| HS  | 1 | 0.91  | 0.97 | 0.93   | 0.88 | 0.83   | 0.77 | 0.71  | 0.66 | 0.61   | 0.56 | 0.46 | 0.37 | 0.32 | 0.29 | 0.28 | 0.27 | 0.26 | 0.26 | 0.26 | 0.26 |      |
| HSH | 1 | 0.91  | 0.85 | 0.87   | 0.65 | 0.72   | 0.56 | 0.58  | 0.45 | 0.47   | 0.37 | 0.38 | 0.30 | 0.31 | 0.24 | 0.25 | 0.20 | 0.20 | 0.16 | 0.16 | 0.13 |      |
| Sn: | 3 | NRep: | 100  | Nloci: | 5000 | Sloci: | 20   | Ngen: | 20   | Nprgy: | 50   | Sel: | 0.2  | Dom: | 0    |      |      |      |      |      |      |      |
| S   | 1 | 0.49  | 0.25 | 0.12   | 0.06 | 0.03   | 0.02 | 0.01  | 0.00 | 0.00   | 0.00 | 0.00 | 0.00 | 0.00 | 0.00 | 0.00 | 0.00 | 0.00 | 0.00 | 0.00 | 0.00 | 0.00 |
| H   | 1 | 0.91  | 0.85 | 0.89   | 0.84 | 0.79   | 0.74 | 0.68  | 0.63 | 0.58   | 0.54 | 0.49 | 0.45 | 0.42 | 0.38 | 0.35 | 0.33 | 0.30 | 0.28 | 0.25 | 0.23 |      |
| SH  | 1 | 0.91  | 0.78 | 0.69   | 0.64 | 0.61   | 0.60 | 0.59  | 0.59 | 0.59   | 0.59 | 0.59 | 0.58 | 0.54 | 0.53 | 0.49 | 0.46 | 0.43 | 0.39 | 0.36 | 0.33 |      |
| HS  | 1 | 0.91  | 0.97 | 0.93   | 0.88 | 0.82   | 0.77 | 0.71  | 0.66 | 0.61   | 0.56 | 0.46 | 0.37 | 0.32 | 0.29 | 0.27 | 0.27 | 0.26 | 0.26 | 0.26 | 0.26 |      |
| HSH | 1 | 0.91  | 0.85 | 0.87   | 0.65 | 0.72   | 0.56 | 0.58  | 0.46 | 0.47   | 0.37 | 0.38 | 0.30 | 0.31 | 0.24 | 0.25 | 0.20 | 0.20 | 0.16 | 0.16 | 0.13 |      |
| Sn: | 4 | NRep: | 100  | Nloci: | 5000 | Sloci: | 20   | Ngen: | 20   | Nprgy: | 50   | Sel: | 0.1  | Dom: | 0.5  |      |      |      |      |      |      |      |
| S   | 1 | 0.49  | 0.25 | 0.12   | 0.06 | 0.03   | 0.02 | 0.01  | 0.00 | 0.00   | 0.00 | 0.00 | 0.00 | 0.00 | 0.00 | 0.00 | 0.00 | 0.00 | 0.00 | 0.00 | 0.00 | 0.00 |
| H   | 1 | 0.91  | 0.85 | 0.89   | 0.84 | 0.79   | 0.74 | 0.68  | 0.63 | 0.58   | 0.54 | 0.49 | 0.46 | 0.42 | 0.39 | 0.35 | 0.33 | 0.30 | 0.28 | 0.25 | 0.23 |      |
| SH  | 1 | 0.91  | 0.77 | 0.68   | 0.64 | 0.61   | 0.60 | 0.59  | 0.59 | 0.58   | 0.58 | 0.58 | 0.57 | 0.54 | 0.52 | 0.49 | 0.46 | 0.42 | 0.39 | 0.36 | 0.33 |      |
| HS  | 1 | 0.91  | 0.97 | 0.93   | 0.88 | 0.82   | 0.77 | 0.71  | 0.66 | 0.61   | 0.56 | 0.46 | 0.37 | 0.32 | 0.29 | 0.28 | 0.27 | 0.26 | 0.26 | 0.26 | 0.26 |      |
| HSH | 1 | 0.91  | 0.85 | 0.87   | 0.65 | 0.72   | 0.56 | 0.58  | 0.45 | 0.47   | 0.37 | 0.38 | 0.30 | 0.31 | 0.24 | 0.25 | 0.20 | 0.20 | 0.16 | 0.16 | 0.13 |      |
| Sn: | 5 | NRep: | 100  | Nloci: | 5000 | Sloci: | 20   | Ngen: | 20   | Nprgy: | 50   | Sel: | 0.2  | Dom: | 0.5  |      |      |      |      |      |      |      |
| S   | 1 | 0.49  | 0.24 | 0.12   | 0.06 | 0.03   | 0.02 | 0.01  | 0.00 | 0.00   | 0.00 | 0.00 | 0.00 | 0.00 | 0.00 | 0.00 | 0.00 | 0.00 | 0.00 | 0.00 | 0.00 | 0.00 |
| H   | 1 | 0.91  | 0.85 | 0.89   | 0.84 | 0.79   | 0.74 | 0.68  | 0.63 | 0.58   | 0.54 | 0.49 | 0.45 | 0.42 | 0.38 | 0.35 | 0.33 | 0.30 | 0.28 | 0.25 | 0.23 |      |
| SH  | 1 | 0.91  | 0.77 | 0.68   | 0.63 | 0.61   | 0.60 | 0.59  | 0.59 | 0.58   | 0.58 | 0.58 | 0.57 | 0.54 | 0.52 | 0.49 | 0.46 | 0.42 | 0.39 | 0.36 | 0.33 |      |
| HS  | 1 | 0.91  | 0.97 | 0.93   | 0.88 | 0.82   | 0.77 | 0.71  | 0.66 | 0.61   | 0.56 | 0.46 | 0.37 | 0.32 | 0.29 | 0.28 | 0.27 | 0.26 | 0.26 | 0.26 | 0.26 |      |
| HSH | 1 | 0.91  | 0.85 | 0.87   | 0.65 | 0.71   | 0.56 | 0.58  | 0.45 | 0.47   | 0.37 | 0.38 | 0.30 | 0.31 | 0.24 | 0.25 | 0.20 | 0.20 | 0.16 | 0.16 | 0.13 |      |
| Sn: | 6 | NRep: | 100  | Nloci: | 5000 | Sloci: | 20   | Ngen: | 20   | Nprgy: | 50   | Sel: | 0.1  | Dom: | 1    |      |      |      |      |      |      |      |
| S   | 1 | 0.49  | 0.25 | 0.12   | 0.06 | 0.03   | 0.02 | 0.01  | 0.00 | 0.00   | 0.00 | 0.00 | 0.00 | 0.00 | 0.00 | 0.00 | 0.00 | 0.00 | 0.00 | 0.00 | 0.00 | 0.00 |
| H   | 1 | 0.91  | 0.85 | 0.89   | 0.84 | 0.79   | 0.74 | 0.68  | 0.63 | 0.58   | 0.54 | 0.50 | 0.46 | 0.42 | 0.39 | 0.35 | 0.33 | 0.30 | 0.28 | 0.25 | 0.23 |      |
| SH  | 1 | 0.91  | 0.77 | 0.69   | 0.64 | 0.61   | 0.60 | 0.59  | 0.59 | 0.59   | 0.58 | 0.58 | 0.57 | 0.54 | 0.53 | 0.49 | 0.46 | 0.43 | 0.39 | 0.36 | 0.33 |      |
| HS  | 1 | 0.91  | 0.97 | 0.93   | 0.88 | 0.83   | 0.77 | 0.71  | 0.66 | 0.61   | 0.56 | 0.46 | 0.37 | 0.32 | 0.29 | 0.28 | 0.27 | 0.26 | 0.26 | 0.26 | 0.26 |      |
| HSH | 1 | 0.91  | 0.85 | 0.87   | 0.66 | 0.72   | 0.56 | 0.58  | 0.45 | 0.47   | 0.37 | 0.38 | 0.30 | 0.31 | 0.24 | 0.25 | 0.20 | 0.20 | 0.16 | 0.16 | 0.13 |      |
| Sn: | 7 | NRep: | 100  | Nloci: | 5000 | Sloci: | 20   | Ngen: | 20   | Nprgy: | 50   | Sel: | 0.2  | Dom: | 1    |      |      |      |      |      |      |      |
| S   | 1 | 0.49  | 0.25 | 0.12   | 0.06 | 0.03   | 0.02 | 0.01  | 0.00 | 0.00   | 0.00 | 0.00 | 0.00 | 0.00 | 0.00 | 0.00 | 0.00 | 0.00 | 0.00 | 0.00 | 0.00 | 0.00 |
| H   | 1 | 0.91  | 0.85 | 0.89   | 0.84 | 0.79   | 0.74 | 0.68  | 0.63 | 0.58   | 0.54 | 0.49 | 0.45 | 0.42 | 0.39 | 0.35 | 0.33 | 0.30 | 0.28 | 0.25 | 0.23 |      |
| SH  | 1 | 0.91  | 0.78 | 0.69   | 0.64 | 0.61   | 0.60 | 0.59  | 0.59 | 0.59   | 0.58 | 0.58 | 0.57 | 0.54 | 0.53 | 0.49 | 0.46 | 0.43 | 0.39 | 0.36 | 0.34 |      |
| HS  | 1 | 0.91  | 0.97 | 0.93   | 0.88 | 0.83   | 0.77 | 0.71  | 0.66 | 0.61   | 0.56 | 0.46 | 0.37 | 0.32 | 0.29 | 0.28 | 0.27 | 0.26 | 0.26 | 0.26 | 0.26 |      |
| HSH | 1 | 0.91  | 0.85 | 0.87   | 0.66 | 0.72   | 0.57 | 0.58  | 0.45 | 0.47   | 0.37 | 0.38 | 0.30 | 0.31 | 0.24 | 0.25 | 0.20 | 0.20 | 0.16 | 0.16 | 0.13 |      |

\* Gen=generation; Sn=genetic scenario number; NRep=number of replication; Nloci=number of loci; Sloci=number of selective loci; Ngen=number of generation; Nprgy=number of progeny; Sel=selection coefficient (*s*); Dom=dominance level (*h*); S=selving; H=half-sib; SH=selving+half-sib; HS=half-sib+selving; HSH=half-sib+selving+half-sib
